# Supplementary material
Source: publisher site journal article supplement (https://www.dovepress.com/get_supplementary_file.php?f=322040.xlsx)
Supplement: Supplementary file 1 [file get_supplementary_file.php]

## Sheet: UEBMI
City	Year																			COVID-19 totoal cost	compensation for COVID-19
		(10,000 people)	(RMB Yuan）				(RMB 10,000 Yuan）		(RMB Yuan）								No COVID-19	No COVID-19 cost	No COVID-19 cost	(per capita 23,000 yuan)		(per capita 23,000 yuan)	(per capita 23,000 yuan)	(per capita 23,000 yuan)
Wuhan	2018	446.58	67992	0.994	0.08	0.6	1.44872e+06	0.183	11181	0.858	0.8	726620	908275	668781	605517	278659	947440	501281	503035	0	0	947440	501281	503035	0.0035	0.011
	2019	456.4	73671	0.994	0.08	0.6	1.60424e+06	0.187	11527.5	0.858	0.8	782349	977936	720074	651957	300031	1.0201e+06	584137	586182	0	0	1.0201e+06	584137	1.09475e+06	0.0035	0.011
	2020	466.43	80487.4	0.994	0.08	0.6	1.79119e+06	0.187	12290	0.858	0.8	852425	1.06553e+06	784572	710354	326905	1.11148e+06	679715	682094	54733.1	43523.8	1.155e+06	636191	1.74521e+06	0.0035	0.011
City C	2018	209.11	72549.5	0.994	0.06	0.6	542873	0.183	11181	0.858	0.8	340238	425298	313155	283532	130481	443636	99236.6	99583.9	0	0	443636	99236.6	99583.9	0.0035	0.011
	2019	235.91	79453	0.994	0.06	0.6	670727	0.187	11527.5	0.858	0.8	404391	505488	372201	336992	155084	527285	143442	143944	0	0	527285	143442	244623	0.0035	0.011
	2020	237.57	88079.5	0.994	0.06	0.6	748782	0.187	12290	0.858	0.8	434172	542715	399612	361810	166505	566116	182665	183305	54733.1	43523.8	609640	139142	386942	0.0035	0.011
City G	2018	684.28	84994.1	0.994	0.08	0.6	2.77492e+06	0.183	11181	0.858	0.855	1.18992e+06	1.39172e+06	1.0952e+06	927814	426980	1.52218e+06	1.25274e+06	1.25712e+06	0	0	1.52218e+06	1.25274e+06	1.25712e+06	0.0035	0.011
	2019	751.95	95763.7	0.994	0.08	0.6	3.43572e+06	0.187	11527.5	0.858	0.855	1.37759e+06	1.61122e+06	1.26793e+06	1.07414e+06	494321	1.76225e+06	1.67346e+06	1.67932e+06	0	0	1.76225e+06	1.67346e+06	2.95027e+06	0.0035	0.011
	2020	804.14	106033	0.994	0.08	0.6	4.06818e+06	0.187	12290	0.858	0.855	1.57064e+06	1.83701e+06	1.44562e+06	1.22467e+06	563595	2.00922e+06	2.05897e+06	2.06617e+06	54733.1	46516	2.05573e+06	2.01245e+06	5.00222e+06	0.0035	0.011
City H	2018	580.5	88752	0.994	0.105	0.6	3.22632e+06	0.183	11181	0.858	0.8	944518	1.18065e+06	869335	787099	362223	1.23156e+06	1.99476e+06	2.00174e+06	0	0	1.23156e+06	1.99476e+06	2.00174e+06	0.0035	0.011
	2019	632.7	97514.5	0.994	0.105	0.6	3.86362e+06	0.187	11527.5	0.858	0.8	1.08456e+06	1.3557e+06	998227	903798	415928	1.41415e+06	2.44946e+06	2.45804e+06	0	0	1.41415e+06	2.44946e+06	4.4818e+06	0.0035	0.011
	2020	681.79	107142	0.994	0.105	0.6	4.57444e+06	0.187	12290	0.858	0.8	1.24601e+06	1.55751e+06	1.14682e+06	1.03834e+06	477844	1.62467e+06	2.94977e+06	2.96009e+06	54733.1	43523.8	1.66819e+06	2.90625e+06	7.44752e+06	0.0035	0.011
City N	2018	160.82	62869.3	0.994	0.08	0.6	482399	0.183	11181	0.858	0.718	234846	327083	216152	218055	100349	316501	165898	166478	0	0	316501	165898	166478	0.0035	0.011
	2019	160.82	68780.9	0.994	0.08	0.6	527759	0.187	11527.5	0.858	0.756	260511	344592	239775	229728	105721	345495	182264	182902	0	0	345495	182264	351211	0.0035	0.011
	2020	160.82	74937.5	0.994	0.08	0.6	574999	0.187	12290	0.858	0.756	277742	367384	255634	244922	112713	368347	206652	207375	54733.1	41130	409477	165522	521175	0.0035	0.011
City X	2018	25.62	72133	0.994	0.08	0.6	88174	0.183	11181	0.858	0.718	37412.9	52107.1	34434.9	34738.1	15986.5	50421.3	37752.7	37884.8	0	0	50421.3	37752.7	37884.8	0.0035	0.011
	2019	29.12	81536	0.994	0.08	0.6	113284	0.187	11527.5	0.858	0.756	47171.3	62395.9	43416.5	41597.3	19143.1	62559.5	50724.4	50902	0	0	62559.5	50724.4	89203.5	0.0035	0.011
	2020	29.17	92800.5	0.994	0.08	0.6	129156	0.187	12290	0.858	0.756	50377.7	66637.1	46367.6	44424.8	20444.3	66811.9	62344	62562.2	54733.1	41130	107942	21214.1	111473	0.0035	0.011

## Sheet: URRBMI
=0.1
City	Year							per capita of times to have outpatient treatment												COVID-19 totoal cost	compensation for COVID-19
		(10,000 people)	(RMB Yuan）	(RMB 10,000 Yuan）		(RMB Yuan）				(RMB 10,000 Yuan）		(RMB Yuan）				No COVID-19	(RMB 10,000 Yuan）	(RMB 10,000 Yuan）	(RMB 10,000 Yuan）	(per capita 23,000 yuan)	(per capita 23,000 yuan)	(per capita cost 23,000 yuan)	(per capita cost 23,000 yuan)	(per capita cost 23,000 yuan)	(per capita cost 23,000 yuan)	(per capita cost 23,000 yuan)
Wuhan	2018	464.7	740	341815	0.994	240.87	1.7	0.2	0.5	17408.7	0.152	6577	0.8552	0.656	0.561011	238440	255848	85966.3	86267.1	0	0	461775	259061	255848	85966.3	86267.1	0.0035	0.011
	2019	467.72	760	353334	0.994	253.36	1.95	0.2	0.5	21140.8	0.166	6748.99	0.8677	0.688	0.596978	286190	307331	46003.8	133381	0	0	520858	310941	307331	46003.8	133381	0.0035	0.011
	2020	470.76	770	360310	0.994	266.49	1.95	0.2	0.5	22380.9	0.166	6925.49	0.8677	0.7	0.60739	300738	323119	37191.2	172169	55259.8	33362.9	593213	360311	356482	3828.35	138690	0.0035	0.011
City C	2018	513.02	670	341661	0.994	296.239	1.7	0.2	0.5	23636.8	0.152	6577	0.8552	0.656	0.561011	263233	286870	54791.3	54983.1	0	0	509791	285998	286870	54791.3	54983.1	0.0035	0.011
	2019	513.09	740	377408	0.994	314.092	1.95	0.2	0.5	28750.7	0.166	6748.99	0.8677	0.688	0.596978	313951	342702	34706.9	90416.3	0	0	571383	341103	342702	34706.9	90416.3	0.0035	0.011
	2020	516.69	770	395464	0.994	333.022	1.95	0.2	0.5	30697.3	0.166	6925.49	0.8677	0.7	0.60739	330080	360777	34687	126219	55259.8	33362.9	645698	392191	394140	1324.16	92739.7	0.0035	0.011
City G	2018	476.81	719	340769	0.994	272.681	1.7	0.2	0.5	20221.4	0.152	6577	0.8552	0.7	0.59864	261063	281285	59484.9	59693.1	0	0	473809	283641	281285	59484.9	59693.1	0.0035	0.011
	2019	495.75	955	470601	0.994	293.893	1.95	0.2	0.5	25992.6	0.166	6748.99	0.8677	0.75	0.650775	330677	356669	113931	174680	0	0	552073	359275	356669	113931	174680	0.0035	0.011
	2020	513.92	1041	531781	0.994	316.754	1.95	0.2	0.5	29041.3	0.166	6925.49	0.8677	0.75	0.650775	351761	380802	150978	328108	55259.8	35745.9	642533	418144	416548	115233	292237	0.0035	0.011
City H	2018	373.93		437449	0.994	255.597	1.7	0.2	0.5	14864.8	0.152	6577	0.8552	0.7	0.59864	204734	219599	217850	218612	0	0	371576	222440	219599	217850	218612	0.0035	0.011
	2019	378		438647	0.994	266.653	1.95	0.2	0.5	17981.9	0.166	6748.99	0.8677	0.7	0.60739	235326	253308	185339	407004	0	0	420945	255678	253308	185339	407004	0.0035	0.011
	2020	381.2		438695	0.994	278.187	1.95	0.2	0.5	18918.5	0.166	6925.49	0.8677	0.7	0.60739	243524	262443	176252	588350	55259.8	33362.9	490870	298149	295805	142889	554871	0.0035	0.011
City N	2018	311.88	730	226306	0.994	287.598	1.7	0.2	0.5	13950.3	0.152	6577	0.8552	0.656	0.561011	160027	173977	52328.9	52512.1	0	0	309917	173867	173977	52328.9	52512.1	0.0035	0.011
	2019	311.99	790	244993	0.994	309.669	1.95	0.2	0.5	17236	0.166	6748.99	0.8677	0.688	0.596978	190901	208137	36856	90074.8	0	0	347436	207411	208137	36856	90074.8	0.0035	0.011
	2020	311.99	810	251196	0.994	333.433	1.95	0.2	0.5	18558.7	0.166	6925.49	0.8677	0.7	0.60739	199310	217869	33326.7	124509	55259.8	33362.9	411781	250112	251232	-36.1613	91029.4	0.0035	0.011
City X	2018	144.33	700	100425	0.994	212.947	1.7	0.2	0.5	4780.13	0.152	6577	0.8552	0.656	0.561011	74056.4	78836.5	21588.3	21663.8	0	0	143422	80461.1	78836.5	21588.3	21663.8	0.0035	0.011
	2019	145.32	782	112958	0.994	227.757	1.95	0.2	0.5	5904.65	0.166	6748.99	0.8677	0.688	0.596978	88918.8	94823.4	18135	40100.6	0	0	161830	96608.9	94823.4	18135	40100.6	0.0035	0.011
	2020	146.32	834	121299	0.994	243.597	1.95	0.2	0.5	6358.76	0.166	6925.49	0.8677	0.7	0.60739	93474.4	99833.2	21465.5	62082.4	55259.8	33362.9	222464	135123	133196	-11897.3	28644.4	0.0035	0.011
=0.2
City	Year							per capita of times to have outpatient treatment												COVID-19 totoal cost	compensation for COVID-19
		(10,000 people)	(RMB Yuan）	(RMB 10,000 Yuan）		(RMB Yuan）				(RMB 10,000 Yuan）		(RMB Yuan）				No COVID-19	(RMB 10,000 Yuan）	(RMB 10,000 Yuan）	(RMB 10,000 Yuan）	(per capita 23,000 yuan)	(per capita 23,000 yuan)	(per capita cost 23,000 yuan)	(per capita cost 23,000 yuan)	(per capita cost 23,000 yuan)	(per capita cost 23,000 yuan)	(per capita cost 23,000 yuan)
Wuhan	2018	464.7	740	341815	0.994	240.87	1.7	0.4	0.5	34817.5	0.152	6577	0.8552	0.656	0.561011	238440	273257	68557.5	68797.5	0	0	461775	259061	273257	68557.5	68797.5	0.0035	0.011
	2019	467.72	760	353334	0.994	253.36	1.95	0.4	0.5	42281.6	0.166	6748.99	0.8677	0.688	0.596978	286190	328471	24863	94417.3	0	0	520858	310941	328471	24863	94504.3	0.0035	0.011
	2020	470.76	770	360310	0.994	266.49	1.95	0.4	0.5	44761.9	0.166	6925.49	0.8677	0.7	0.60739	300738	345500	14810.3	110266	55259.8	33362.9	593213	360311	378863	-18552.6	76991.2	0.0035	0.011
City C	2018	513.02	670	341661	0.994	296.239	1.7	0.4	0.5	47273.5	0.152	6577	0.8552	0.656	0.561011	263233	310506	31154.6	31263.6	0	0	509791	285998	310506	31154.6	31263.6	0.0035	0.011
	2019	513.09	740	377408	0.994	314.092	1.95	0.4	0.5	57501.4	0.166	6748.99	0.8677	0.688	0.596978	313951	371452	5956.2	37563.7	0	0	571383	341103	371452	5956.2	37584.6	0.0035	0.011
	2020	516.69	770	395464	0.994	333.022	1.95	0.4	0.5	61394.6	0.166	6925.49	0.8677	0.7	0.60739	330080	391474	3989.72	-29866.6	55259.8	33362.9	645698	392191	424837	-29373.1	8624.86	0.0035	0.011
City G	2018	476.81	719	340769	0.994	272.681	1.7	0.4	0.5	40442.9	0.152	6577	0.8552	0.7	0.59864	261063	301506	39263.5	39400.9	0	0	473809	283641	301506	39263.5	39400.9	0.0035	0.011
	2019	495.75	955	470601	0.994	293.893	1.95	0.4	0.5	51985.1	0.166	6748.99	0.8677	0.75	0.650775	330677	382662	87938.7	128081	0	0	552073	359275	382662	87938.7	128081	0.0035	0.011
	2020	513.92	1041	531781	0.994	316.754	1.95	0.4	0.5	58082.6	0.166	6925.49	0.8677	0.75	0.650775	351761	409844	121937	251854	55259.8	35745.9	642533	418144	445590	86191.3	215983	0.0035	0.011
City H	2018	373.93		437449	0.994	255.597	1.7	0.4	0.5	29729.6	0.152	6577	0.8552	0.7	0.59864	204734	234464	202985	203695	0	0	371576	222440	234464	202985	203695	0.0035	0.011
	2019	378		438647	0.994	266.653	1.95	0.4	0.5	35963.8	0.166	6748.99	0.8677	0.7	0.60739	235326	271290	167357	373879	0	0	420945	255678	271290	167357	373879	0.0035	0.011
	2020	381.2		438695	0.994	278.187	1.95	0.4	0.5	37837.1	0.166	6925.49	0.8677	0.7	0.60739	243524	281361	157333	535876	55259.8	33362.9	490870	298149	314724	123971	502396	0.0035	0.011
City N	2018	311.88	730	226306	0.994	287.598	1.7	0.4	0.5	27900.7	0.152	6577	0.8552	0.656	0.561011	160027	187928	38378.6	38512.9	0	0	309917	173867	187928	38378.6	38512.9	0.0035	0.011
	2019	311.99	790	244993	0.994	309.669	1.95	0.4	0.5	34471.9	0.166	6748.99	0.8677	0.688	0.596978	190901	225373	19620.1	58625.3	0	0	347436	207411	225373	19620.1	58625.3	0.0035	0.011
	2020	311.99	810	251196	0.994	333.433	1.95	0.4	0.5	37117.3	0.166	6925.49	0.8677	0.7	0.60739	199310	236428	14768	74038.2	55259.8	33362.9	411781	250112	269790	-18594.8	40675.4	0.0035	0.011
City X	2018	144.33	700	100425	0.994	212.947	1.7	0.4	0.5	9560.26	0.152	6577	0.8552	0.656	0.561011	74056.4	83616.7	16808.2	16867	0	0	143422	80461.1	83616.7	16808.2	16867	0.0035	0.011
	2019	145.32	782	112958	0.994	227.757	1.95	0.4	0.5	11809.3	0.166	6748.99	0.8677	0.688	0.596978	88918.8	100728	12230.3	29325.6	0	0	161830	96608.9	100728	12230.3	29325.6	0.0035	0.011
	2020	146.32	834	121299	0.994	243.597	1.95	0.4	0.5	12717.5	0.166	6925.49	0.8677	0.7	0.60739	93474.4	106192	15106.8	44807.9	55259.8	33362.9	222464	135123	139555	-18256.1	11392.1	0.0035	0.011
=0.3
City	Year							per capita of times to have outpatient treatment												COVID-19 totoal cost	compensation for COVID-19
		(10,000 people)	(RMB Yuan）	(RMB 10,000 Yuan）		(RMB Yuan）				(RMB 10,000 Yuan）		(RMB Yuan）				No COVID-19	(RMB 10,000 Yuan）	(RMB 10,000 Yuan）	(RMB 10,000 Yuan）	(per capita 23,000 yuan)	(per capita 23,000 yuan)	(per capita cost 23,000 yuan)	(per capita cost 23,000 yuan)	(per capita cost 23,000 yuan)	(per capita cost 23,000 yuan)	(per capita cost 23,000 yuan)
Wuhan	2018	464.7	740	341815	0.994	240.87	1.7	0.6	0.5	52226.2	0.152	6577	0.8552	0.656	0.561011	238440	290666	51148.8	51327.8	0	0	461775	259061	290666	51148.8	51327.8	0.0035	0.011
	2019	467.72	760	353334	0.994	253.36	1.95	0.6	0.5	63422.4	0.166	6748.99	0.8677	0.688	0.596978	286190	349612	3722.2	55614.6	0	0	520858	310941	349612	3722.2	55627.6	0.0035	0.011
	2020	470.76	770	360310	0.994	266.49	1.95	0.6	0.5	67142.8	0.166	6925.49	0.8677	0.7	0.60739	300738	367881	-7570.64	-39386.5	55259.8	33362.9	593213	360311	401244	-40933.5	15306	0.0035	0.011
City C	2018	513.02	670	341661	0.994	296.239	1.7	0.6	0.5	70910.3	0.152	6577	0.8552	0.656	0.561011	263233	334143	7517.82	-21380.3	0	0	509791	285998	334143	7517.82	7544.13	0.0035	0.011
	2019	513.09	740	377408	0.994	314.092	1.95	0.6	0.5	86252.1	0.166	6748.99	0.8677	0.688	0.596978	313951	400203	-22794.5	-57405.7	0	0	571383	341103	400203	-22794.5	-15167.4	0.0035	0.011
	2020	516.69	770	395464	0.994	333.022	1.95	0.6	0.5	92091.9	0.166	6925.49	0.8677	0.7	0.60739	330080	422172	-26707.6	-63218.7	55259.8	33362.9	645698	392191	455535	-60070.4	-60070.4	0.0035	0.011
City G	2018	476.81	719	340769	0.994	272.681	1.7	0.6	0.5	60664.3	0.152	6577	0.8552	0.7	0.59864	261063	321727	19042	-8782.29	0	0	473809	283641	321727	19042	19108.7	0.0035	0.011
	2019	495.75	955	470601	0.994	293.893	1.95	0.6	0.5	77977.7	0.166	6748.99	0.8677	0.75	0.650775	330677	408654	61946.1	62163	0	0	552073	359275	408654	61946.1	81481.8	0.0035	0.011
	2020	513.92	1041	531781	0.994	316.754	1.95	0.6	0.5	87123.9	0.166	6925.49	0.8677	0.75	0.650775	351761	438885	92895.9	156068	55259.8	35745.9	642533	418144	474631	57150	139728	0.0035	0.011
City H	2018	373.93		437449	0.994	255.597	1.7	0.6	0.5	44594.4	0.152	6577	0.8552	0.7	0.59864	204734	249329	188120	188779	0	0	371576	222440	249329	188120	188779	0.0035	0.011
	2019	378		438647	0.994	266.653	1.95	0.6	0.5	53945.8	0.166	6748.99	0.8677	0.7	0.60739	235326	289272	149375	340753	0	0	420945	255678	289272	149375	340753	0.0035	0.011
	2020	381.2		438695	0.994	278.187	1.95	0.6	0.5	56755.6	0.166	6925.49	0.8677	0.7	0.60739	243524	300280	138415	483401	55259.8	33362.9	490870	298149	333643	105052	449921	0.0035	0.011
City N	2018	311.88	730	226306	0.994	287.598	1.7	0.6	0.5	41851	0.152	6577	0.8552	0.656	0.561011	160027	201878	24428.3	24513.8	0	0	309917	173867	201878	24428.3	24513.8	0.0035	0.011
	2019	311.99	790	244993	0.994	309.669	1.95	0.6	0.5	51707.9	0.166	6748.99	0.8677	0.688	0.596978	190901	242609	2384.13	27167.5	0	0	347436	207411	242609	2384.13	27175.9	0.0035	0.011
	2020	311.99	810	251196	0.994	333.433	1.95	0.6	0.5	55676	0.166	6925.49	0.8677	0.7	0.60739	199310	254986	-3790.64	-25842.9	55259.8	33362.9	411781	250112	288349	-37153.5	-9678.69	0.0035	0.011
City X	2018	144.33	700	100425	0.994	212.947	1.7	0.6	0.5	14340.4	0.152	6577	0.8552	0.656	0.561011	74056.4	88396.8	12028	12070.1	0	0	143422	80461.1	88396.8	12028	12070.1	0.0035	0.011
	2019	145.32	782	112958	0.994	227.757	1.95	0.6	0.5	17714	0.166	6748.99	0.8677	0.688	0.596978	88918.8	106633	6325.65	18528.5	0	0	161830	96608.9	106633	6325.65	18550.7	0.0035	0.011
	2020	146.32	834	121299	0.994	243.597	1.95	0.6	0.5	19076.3	0.166	6925.49	0.8677	0.7	0.60739	93474.4	112551	8748.01	27480.4	55259.8	33362.9	222464	135123	145914	-24614.9	-5860.11	0.0035	0.011
